# Supplementary material for: Assessing water security in the São Paulo metropolitan region under projected climate change
Source: Copernicus journal article supplement (doi:10.5194/hess-23-4955-2019), 2019-12-04
Supplement: Supplementary file 1 [file hess-23-4955-2019-supplement.zip]

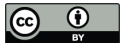

## *Supplement of*

# **Assessing water security in the São Paulo metropolitan region under projected climate change**

**Gabriela Chiquito Gesualdo et al.**

*Correspondence to:* Paulo Tarso Oliveira ([paulotarsoms@gmail.com](mailto:paulotarsoms@gmail.com))

- [hess-23-4955-2019-supplement-title-page.pdf](#)
- [Supplement\\_material](#)
  - [HymoModel\\_Supplement\\_S1.tif](#)
  - [Readme.txt](#)
  - [S2\\_Jaguari-1991-2008.csv](#)
  - [S3\\_RCP45.csv](#)
  - [S3\\_RCP45\\_monthlyvariables.csv](#)
  - [S3\\_RCP85.csv](#)
  - [S3\\_RCP85\\_monthlyvariables.csv](#)
  - [S4\\_WaterScarcity\\_RCP45.csv](#)
  - [S4\\_WaterScarcity\\_RCP85.csv](#)
  - [S4\\_WaterVulnerability\\_RCP45.csv](#)
  - [S4\\_WaterVulnerability\\_RCP85.csv](#)
  - [Supplement\\_S1.docx](#)

The copyright of individual parts of the supplement might differ from the CC BY 4.0 License.
